# Supplementary material for: Incidence of postoperative fever and bloodstream infections in gynecological surgical patients: a three-year retrospective surveillance
Source: Research Square preprint supplement (doi:10.21203/rs.3.rs-6917920/v1), 2025-07-31
Supplement: Supplementary file 1 [file 236dc56a068ea4b4a598d774.docx]

Table 2. Quarterly Incidence of PF and PBSIs

| Quarter | Postoperative fever (PF) | | |  | Postoperative bloodstream infection (PBSI) | | |
| --- | --- | --- | --- | --- | --- | --- | --- |
| Incidence (%, n/N) | χ² * | *P*value* |  | Incidence (%, n/N ) | χ² * | *P*value* |
| Q1 | 2.21 (110/4971) | Ref. | Ref. |  | 0.91(45/4971) | Ref. | Ref. |
| Q2 | 2.12(114/5381) | 0.10 | 0.756 |  | 1.13(61/5381) | 1.33 | 0.249 |
| Q3 | 3.20(168/5248) | 9.47 | 0.002 |  | 1.71(90/5248) | 12.75 | <0.001 |
| Q4 | 3.25(140/4306) | 9.53 | 0.002 |  | 1.46(63/4306) | 6.16 | 0.013 |

** All statistical comparisons (Chi-squared test) were made against the first quarter (Q1) as the reference group.*
