# Supplementary material for: Incidence of postoperative fever and bloodstream infections in gynecological surgical patients: a three-year retrospective surveillance
Source: Research Square preprint supplement (doi:10.21203/rs.3.rs-6917920/v1), 2025-07-31
Supplement: Supplementary file 2 [file 96f97806b069aa4c3c4c5729.docx]

Table 4. Comparison of the incidence rates of PF and PBSI by type of surgery

| Type of surgery | Incidence of PF  (%, n/N) | χ² * | *P*value* | Incidence of PBSI  (%, n/N) | χ² * | *P*value* |
| --- | --- | --- | --- | --- | --- | --- |
| Gynecological surgery | 2.71  (498/18368) | 0.04 | 0.841 | 1.32  (242/18368) | 0.01 | 0.920 |
| Gynecology + Obstetrics Surgery | 0.49  (5/1015) | 17.49 | <0.001 | 0  (0/1015) | 12.33 | <0.001 |
| Gynecology + Gastrointestinal Surgery | 6.98  (24/344) | 21.88 | <0.001 | 4.07  (14/344) | 17.47 | <0.001 |
| Gynecology + Urological Tract Surgery | 0  (0/96) | 1.70 | 0.192 | 0  (0/96) | 0.45 | 0.502 |
| Gynecology + Hepatobiliary Surgery | 10.00  (2/20) | 1.78 | 0.182 | 10  (2/20) | 5.94 | 0.015 |
| Gynecology + Other surgeries | 4.76  (3/63) | 0.40 | 0.527 | 1.59  (1/63) | 0.00 | 1.000 |
| Total | 2.67  (532/19906) | Ref. | Ref. | 1.3  (259/19906) | Ref. | Ref. |

** The 'Total' row was used as the reference group for all Chi-squared (χ²) tests and P value calculations.*
