# Supplementary material for: Incidence of postoperative fever and bloodstream infections in gynecological surgical patients: a three-year retrospective surveillance
Source: Research Square preprint supplement (doi:10.21203/rs.3.rs-6917920/v1), 2025-07-31
Supplement: Supplementary file 3 [file aa883a2dba3f38adc9afb59f.docx]

| Pathogenic bacteria | Number of isolates (n) | Percentage (%) |
| --- | --- | --- |
| Escherichia coli | 19 | 70.37 |
| Staphylococcus epidermidis | 3 | 11.11 |
| Staphylococcus hominis | 2 | 7.41 |
| Bacteroides fragilis | 1 | 3.70 |
| Enterobacter cloacae | 1 | 3.70 |
| Klebsiella pneumoniae | 1 | 3.70 |
| **Total** | **27** | **100.00** |

Table 3. Pathogenic bacteria distribution in PBSIs following gynecological surgery
